# Supplementary material for: Under-reporting of non-fatal occupational injuries among precarious and non-precarious workers in Sweden
Source: HighWire-hosted journal article supplement (doi:10.1136/oemed-2021-107856), 2021-09-20
Supplement: oemed-2021-107856supp001_data_supplement.pdf [file oemed-2021-107856supp001_data_supplement.pdf]

**Supplementary Material 1.** Flow chart total population included in the study in 2013.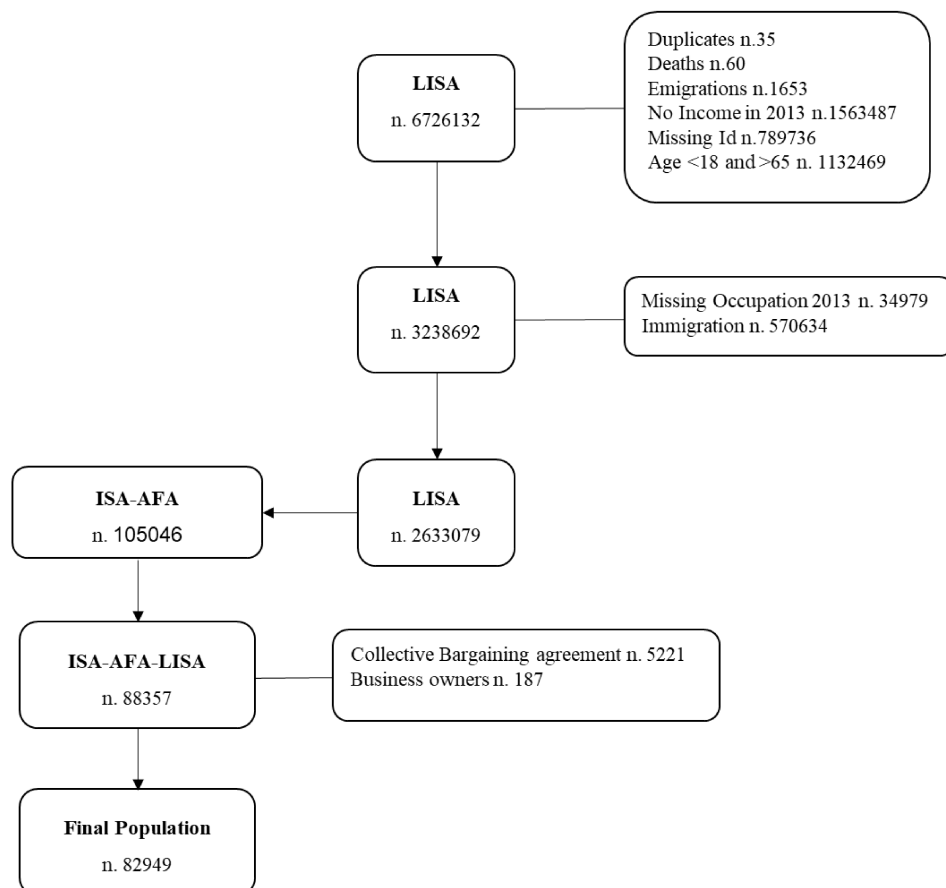

**Supplementary material 2.** Capture–recapture estimates of under-reported non-fatal occupational injuries by socio-demographic factors in 2013 in Sweden.

|                                                                                                  | Total observed* | Under-report %<br>(95% CI) |
|--------------------------------------------------------------------------------------------------|-----------------|----------------------------|
| <b>Gender</b>                                                                                    |                 |                            |
| <i>male</i>                                                                                      | 41291           | 14.4 (14-14.7)             |
| <i>female</i>                                                                                    | 41658           | 17.8 (17.4-18.3)           |
| <b>Age</b>                                                                                       |                 |                            |
| <i>18-24</i>                                                                                     | 6015            | 19.8 (18.6-21)             |
| <i>25-34</i>                                                                                     | 17066           | 16.5 (15.9-17.1)           |
| <i>35-54</i>                                                                                     | 41271           | 15.9 (15.5-16.3)           |
| <i>55-65</i>                                                                                     | 18597           | 15.5 (14.9-16)             |
| <b>Country of birth</b>                                                                          |                 |                            |
| <i>Sweden</i>                                                                                    | 68115           | 16.0 (15.7-16.3)           |
| <i>Nordic countries</i>                                                                          | 2098            | 15.1 (13.5-16.8)           |
| <i>EU-28</i>                                                                                     | 5549            | 16.8 (15.8-17.8)           |
| <i>Non EU-28</i>                                                                                 | 6839            | 18.2 (17.2-19.2)           |
| <b>Educational Level</b>                                                                         |                 |                            |
| <i>Primary school</i>                                                                            | 9669            | 14.7 (14-15.4)             |
| <i>Secondary school</i>                                                                          | 50818           | 16.4 (16-16.7)             |
| <i>Tertiary education &lt;3y</i>                                                                 | 10962           | 12.6 (12-13.3)             |
| <i>Tertiary education ≥3y</i>                                                                    | 11300           | 20.9 (20-21.9)             |
| <b>Family composition</b>                                                                        |                 |                            |
| <i>single</i>                                                                                    | 28039           | 16.1 (15.6-16.5)           |
| <i>single with children</i>                                                                      | 8316            | 18.1 (17.1-19.0)           |
| <i>couple with children</i>                                                                      | 33937           | 16.3 (15.9-16.7)           |
| <i>couple with no children</i>                                                                   | 12657           | 15.3 (14.6-15.9)           |
| *Total observed is the total of those injuries reported to ISA only, AFA only and their overlap. |                 |                            |

**Supplementary Material 3.** Capture–recapture estimates of under-reported non-fatal occupational injuries by severity and employment relationship in 2013 in Sweden adjusted by sex, age and country of birth.

| <b>Injury Severity</b>                                                      | <b>Total observed</b> | <b>Underreport %<br/>(95% CI)</b> | <b>Captured ISA %<br/>(95% CI)</b> | <b>Captured AFA %<br/>(95% CI)</b> |
|-----------------------------------------------------------------------------|-----------------------|-----------------------------------|------------------------------------|------------------------------------|
| <b>Total</b>                                                                |                       |                                   |                                    |                                    |
| <i>no healthcare</i>                                                        | 67441                 | 18.0 (17.7-18.3)                  | 70.3 (69.8-70.7)                   | 39.3 (39.0-39.7)                   |
| <i>outpatient</i>                                                           | 13448                 | 9.04 (8.63-9.46)                  | 71.5 (70.7-72.3)                   | 68.4 (67.6-69.39)                  |
| <i>hospitalized</i>                                                         | 1712                  | 3.6 (2.97-4.24)                   | 78.8 (76.8-80.8)                   | 83.5 (81.5-85.4)                   |
| <b>Precarious</b>                                                           |                       |                                   |                                    |                                    |
| <i>no healthcare</i>                                                        | 5001                  | 25.4 (23.9-26.8)                  | 62.1 (60.3-63.8)                   | 33.0 (31.8-34.2)                   |
| <i>outpatient</i>                                                           | 1135                  | 12.9 (11.1-14.7)                  | 66.7 (63.6-69.7)                   | 61.6 (58.7-64.6)                   |
| <i>hospitalized</i>                                                         | 115                   | 7.75 (3.26-12.2)                  | 67.5 (58.8-76.2)                   | 77.2 (68.7-85.7)                   |
| <b>Borderline Precarious</b>                                                |                       |                                   |                                    |                                    |
| <i>no healthcare</i>                                                        | 18902                 | 19.4 (18.7-20.0)                  | 68.7 (67.9-69.6)                   | 37.8 (37.2-38.5)                   |
| <i>outpatient</i>                                                           | 3665                  | 9.86 (9.03-10.7)                  | 69.8 (68.2-71.4)                   | 67.5 (65.9-69.1)                   |
| <i>hospitalized</i>                                                         | 508                   | 4.09 (2.82-5.37)                  | 78.0 (74.3-81.8)                   | 81.2 (77.5-84.9)                   |
| <b>Non-Precarious</b>                                                       |                       |                                   |                                    |                                    |
| <i>no healthcare</i>                                                        | 43538                 | 16.7 (16.3-17.1)                  | 71.8 (71.3-72.4)                   | 40.7 (40.2-41.2)                   |
| <i>outpatient</i>                                                           | 8648                  | 8.26 (7.76-8.75)                  | 72.8 (71.7-73.9)                   | 69.7 (68.7-70.8)                   |
| <i>hospitalized</i>                                                         | 1089                  | 2.96 (2.26-3.65)                  | 80.4 (77.9-82.9)                   | 85.2 (82.9-87.5)                   |
| AFA= AFA Insurance<br>ISA= the Information System on occupational injuries. |                       |                                   |                                    |                                    |

**Supplementary material 4.** Capture–recapture estimates of under-reported non-fatal occupational injuries by severity and employment relationship in 2013 in Sweden using company size cut-off of  $\geq 50$  employees as Orellana et al (2020).

|                                                                             | Total observed | Underreport % (95% CI) | Captured ISA % (95% CI) | Captured AFA % (95% CI) |
|-----------------------------------------------------------------------------|----------------|------------------------|-------------------------|-------------------------|
| <b>Total</b>                                                                |                |                        |                         |                         |
| <i>no healthcare</i>                                                        | 62319          | 16.6 (16.3-17.0)       | 72.7 (72.3-73.2)        | 39.0 (38.6-39.3)        |
| <i>outpatient</i>                                                           | 10809          | 7.95 (7.54-8.35)       | 74.4 (73.5-75.3)        | 69.0 (68.1-69.9)        |
| <i>hospitalized</i>                                                         | 1236           | 3.56 (2.85-4.26)       | 80.0 (77.5-82.5)        | 82.2 (80.0-84.5)        |
| <b>Precarious</b>                                                           |                |                        |                         |                         |
| <i>no healthcare</i>                                                        | 4364           | 22.8 (21.3-24.2)       | 66 (64.2-67.8)          | 32.9 (31.6-34.2)        |
| <i>outpatient</i>                                                           | 843            | 11.2 (9.25-13.1)       | 70.1 (66.7-73.5)        | 62.7 (59.3-66.1)        |
| <i>hospitalized</i>                                                         | 69             | 8 (1.99-14)            | 66.7 (54.7-78.6)        | 76 (63.9-88.1)          |
| <b>Borderline Precarious</b>                                                |                |                        |                         |                         |
| <i>no healthcare</i>                                                        | 17303          | 17.9 (17.2-18.6)       | 71.4 (70.5-72.3)        | 37.4 (36.7-38.1)        |
| <i>outpatient</i>                                                           | 2839           | 8.7 (7.85-9.54)        | 73 (71.2-74.7)          | 67.8 (66-69.6)          |
| <i>hospitalized</i>                                                         | 358            | 4.52 (2.97-6.07)       | 77.1 (72.3-81.9)        | 80.3 (75.9-84.6)        |
| <b>Non-Precarious</b>                                                       |                |                        |                         |                         |
| <i>no healthcare</i>                                                        | 40652          | 15.6 (15.2-16)         | 73.9 (73.3-74.5)        | 40.3 (39.8-40.8)        |
| <i>outpatient</i>                                                           | 7127           | 7.34 (6.87-7.82)       | 75.4 (74.3-76.5)        | 70.2 (69.1-71.3)        |
| <i>hospitalized</i>                                                         | 809            | 2.91 (2.16-3.66)       | 82.3 (79.585.2)         | 83.5 (80.7-86.3)        |
| AFA= AFA Insurance<br>ISA= the Information System on occupational injuries. |                |                        |                         |                         |
